# Supplementary material for: NIK–IKK complex interaction controls NF-κB-dependent inflammatory activation of endothelium in response to LTβR ligation
Source: Oxford University Press journal article supplement (doi:10.1242/jcs.225615), 2019-03-05
Supplement: jcs225615supp.pdf [file jcs225615supp.pdf]

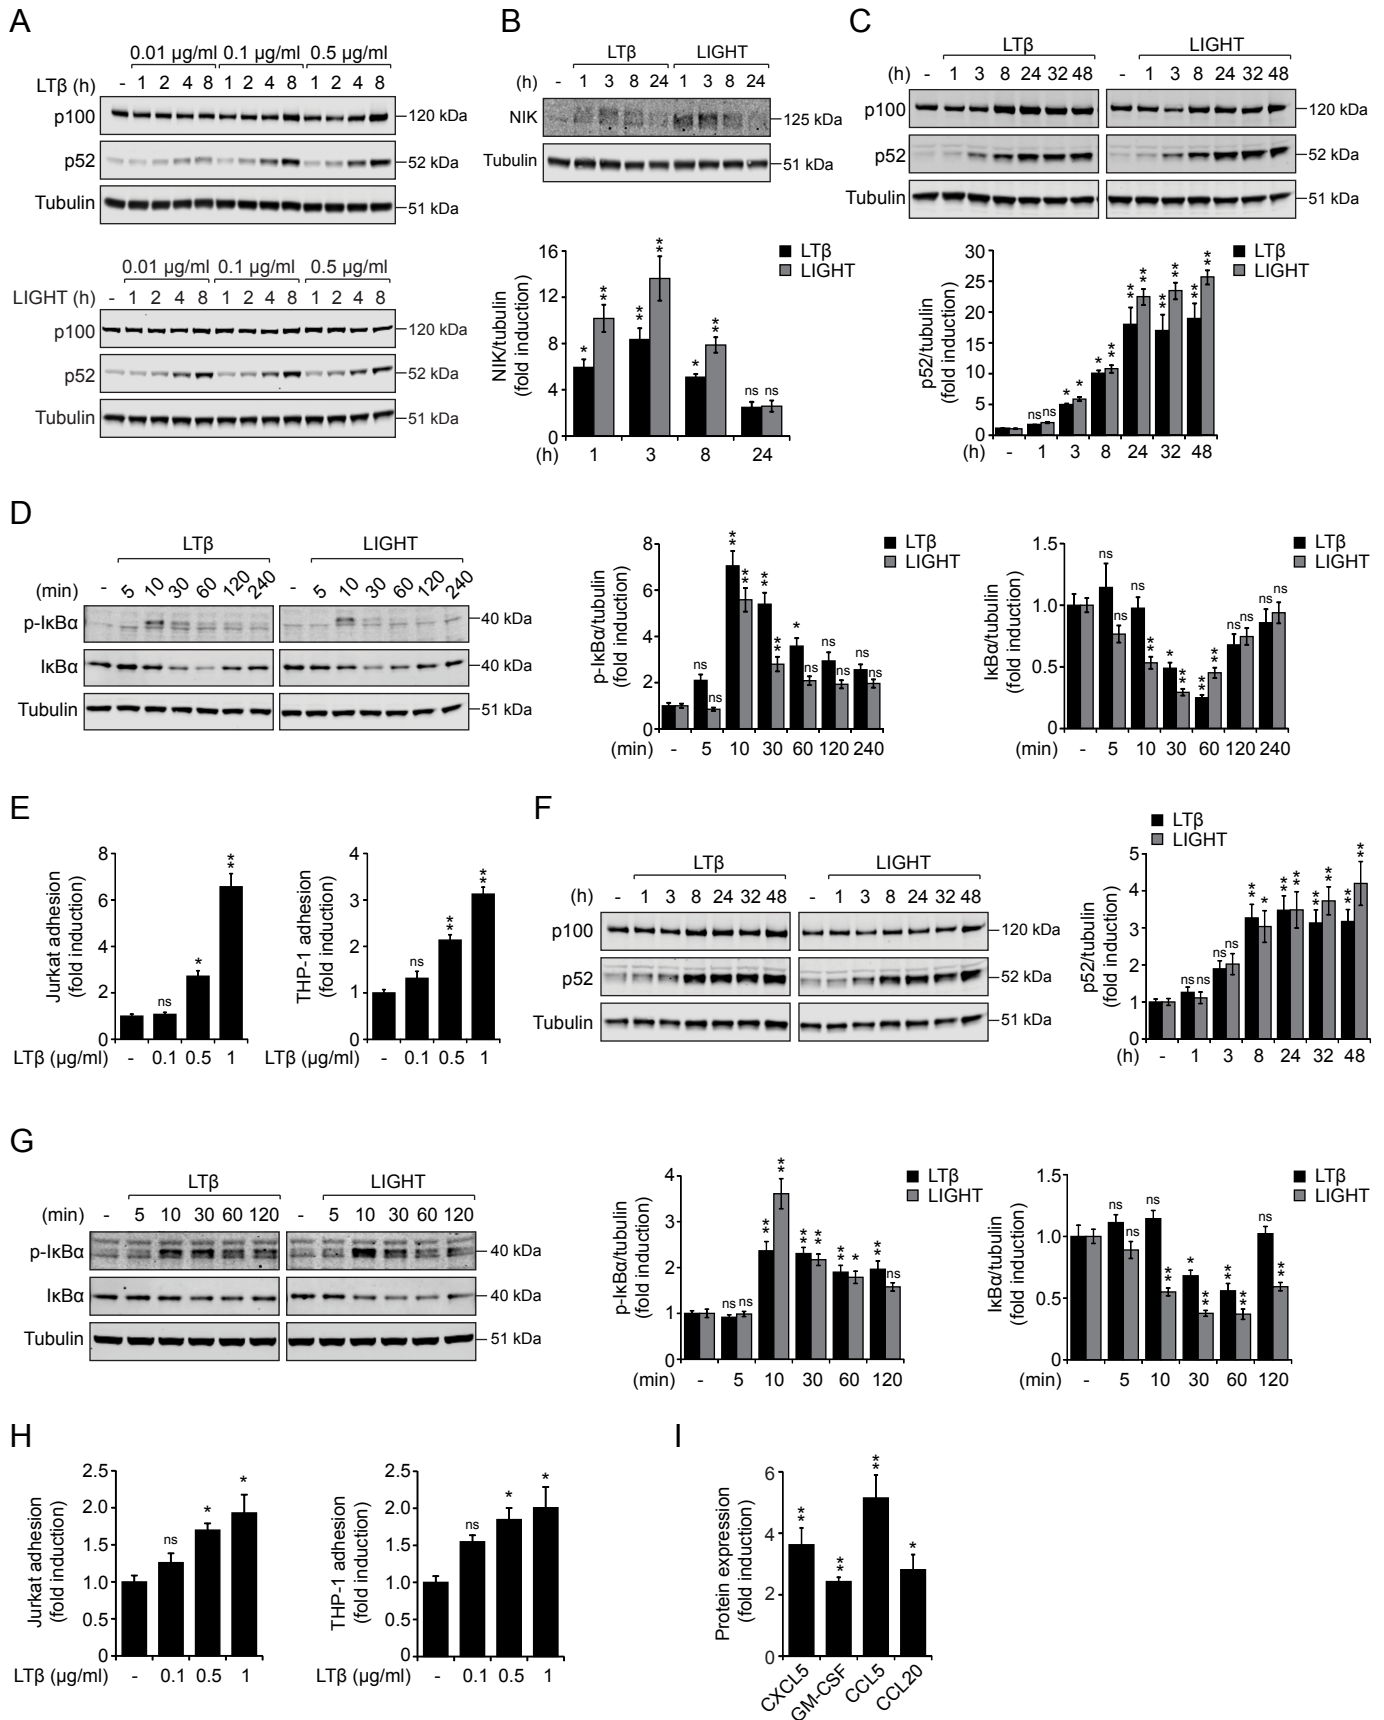

**Figure S1. LT $\beta$ R ligation activates NF- $\kappa$ B signaling and inflammation in endothelial cells.** (A) Immunoblot analysis of p100/p52 and tubulin as a loading control in HUVECs treated with various concentrations of LT $\beta$  or LIGHT for the indicated time points. Data shown are representative of two independent experiments. h, hours. (B) Immunoblot analysis of NIK and tubulin as a loading control in EA.hy926 cells treated with LT $\beta$  (0.1  $\mu$ g/ml) or LIGHT (0.1  $\mu$ g/ml) for the indicated time points. Upper panel: immunoblotting data from a representative experiment. h, hours. Lower panel: densitometric analysis of NIK bands from three independent experiments. (C) Immunoblot analysis of p100/p52 and tubulin as a loading control in EA.hy926 cells treated with LT $\beta$  (0.1  $\mu$ g/ml) or LIGHT (0.1  $\mu$ g/ml) for the indicated time points. Upper panel: immunoblotting data from a representative experiment. h, hours. Lower panel: densitometric analysis of p52 bands from three independent experiments. (D) Immunoblot analysis of phospho-I $\kappa$ B $\alpha$  (Ser32/36) (p-I $\kappa$ B $\alpha$ ), I $\kappa$ B $\alpha$  and tubulin as a loading control in EA.hy926 cells treated with LT $\beta$  (0.1  $\mu$ g/ml) or LIGHT (0.1  $\mu$ g/ml) for the indicated time points. Left panel: immunoblotting data from a representative experiment. min, minutes. Middle and right panels: densitometric analysis of p-I $\kappa$ B $\alpha$  and I $\kappa$ B $\alpha$  bands from three independent analysis. (E) Adhesion of Jurkat cells (left panel) or THP-1 cells (right panel) to EA.hy926 cells treated with indicated concentrations of LT $\beta$  for 24 hours. (F) Immunoblot analysis of p100/p52 and tubulin as a loading control in HMVECs treated with LT $\beta$  (0.1  $\mu$ g/ml) or LIGHT (0.1  $\mu$ g/ml) for the indicated time points. Left panel: immunoblotting data from a representative experiment. h, hours. Right panel: densitometric analysis of p52 bands from three independent experiments. (G) Immunoblot analysis of phospho-I $\kappa$ B $\alpha$  (Ser32/36) (p-I $\kappa$ B $\alpha$ ), I $\kappa$ B $\alpha$  and tubulin as a loading control in HMVECs treated with LT $\beta$  (0.1  $\mu$ g/ml) or LIGHT (0.1  $\mu$ g/ml) for the indicated time points. Left panel: immunoblotting data from a representative experiment. min, minutes. Middle and right panels: densitometric analysis of p-I $\kappa$ B $\alpha$  and I $\kappa$ B $\alpha$  bands from three independent analysis. (H) Adhesion of Jurkat cells (left panel) or THP-1 cells (right panel) to HMVECs treated with indicated concentrations of LT $\beta$  for 24 hours. (I) Quantification of CXCL5, GM-CSF, CCL5 and CCL20 protein levels by Proteome Profiler Human XL Cytokine Array Kit in conditioned medium from HMVECs treated with LT $\beta$  (0.25  $\mu$ g/ml) for 24 hours. (B-I) Data represent mean  $\pm$  s.e.m. of three independent experiments. ns, not significant; \* $P \leq 0.05$ , \*\* $P \leq 0.01$  versus control (one-way ANOVA and Tukey's HSD post hoc test).

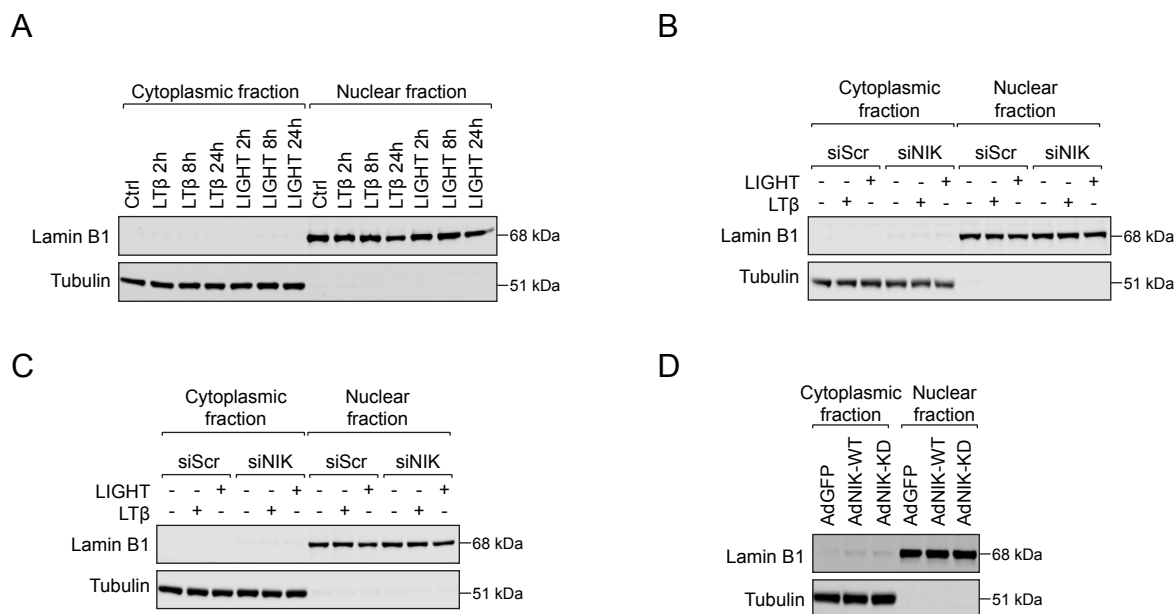

**Figure S2. Fractionation of nuclear and cytoplasmic proteins.** (A-D) Fractionation of cell lysates of HUVECs treated as described in Fig. 1C (A), Fig. 2B (B), Fig. S5F (C) and Fig. 3B (D).

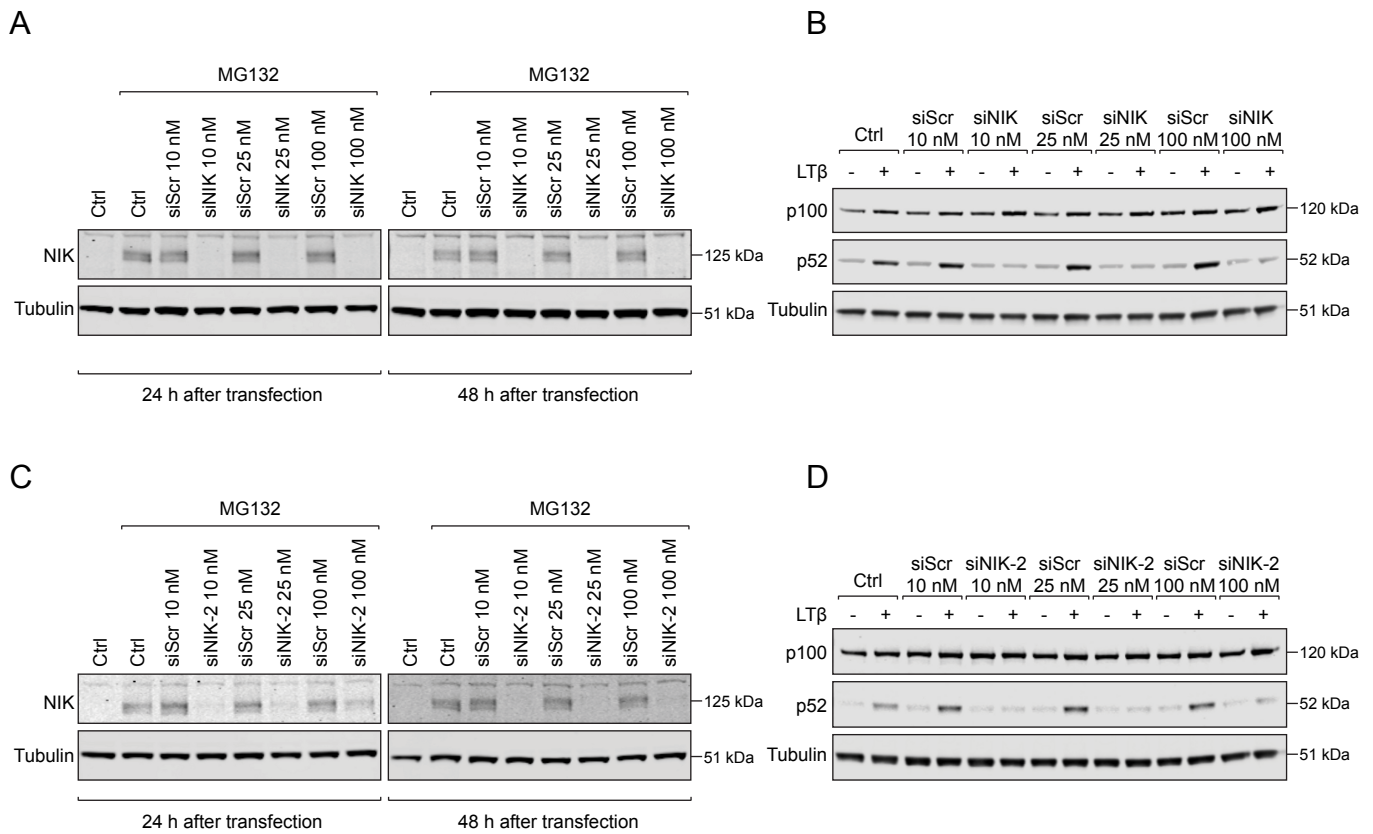

**Figure S3. RNAi-mediated knockdown of NIK impairs activation of the non-canonical NF- $\kappa$ B pathway in HUVECs.** (A,C) Immunoblot analysis of NIK in HUVECs left untreated (Ctrl) or transfected with scrambled siRNA (siScr) or siRNA targeting NIK [siNIK (A) or siNIK-2 (C)] at indicated concentrations and grown for 24 or 48 hours. Cells were incubated with the proteasome inhibitor MG132 (50  $\mu$ M) for the last 3 hours to prevent NIK degradation. (B,D) Immunoblot analysis of p100/p52 in HUVECs left untreated (Ctrl) or transfected with siScr or siRNA targeting NIK [siNIK (B) or siNIK-2 (D)] at indicated concentrations for 24 hours, followed by stimulation with LT $\beta$  (0.2  $\mu$ g/ml) for 16 hours. (A-D) Tubulin was used as a loading control. Data shown are representative of two independent experiments.

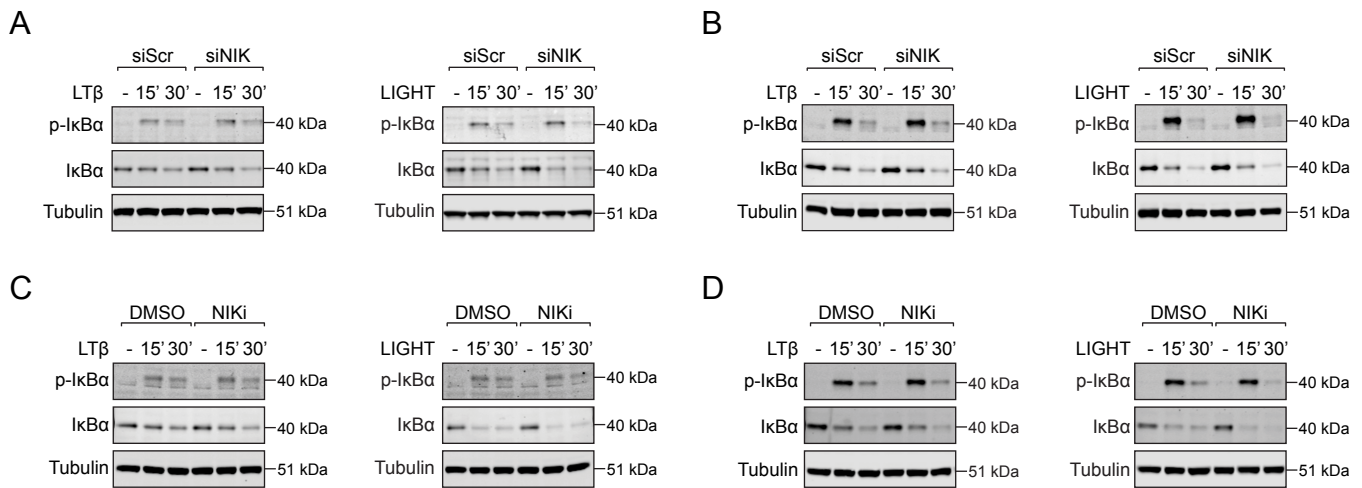

**Figure S4. Immediate activation of canonical NF-κB signaling in response to LTβR ligation is not dependent on NIK activity.** (A,B) Immunoblot analysis of phospho-IκBα (Ser32/36) (p-IκBα), IκBα and tubulin as a loading control in HUVECs (A) and EA.hy926 cells (B) transfected with scrambled siRNA (siScr; 10 nM) or siRNA targeting NIK (siNIK; 10 nM) and stimulated with LTβ (0.25 μg/ml) or LIGHT (0.25 μg/ml) for the indicated time points. (C,D) Immunoblot analysis of phospho-IκBα (Ser32/36) (p-IκBα), IκBα and tubulin as a loading control in HUVECs (C) and EA.hy926 cells (D) treated with DMSO or NIK inhibitor (NIK<sub>i</sub>; 2.5 μM) for 30 minutes, followed by stimulation with LTβ (0.25 μg/ml) or LIGHT (0.25 μg/ml) for the indicated time points. (A-D) Data shown are representative of two independent experiments.

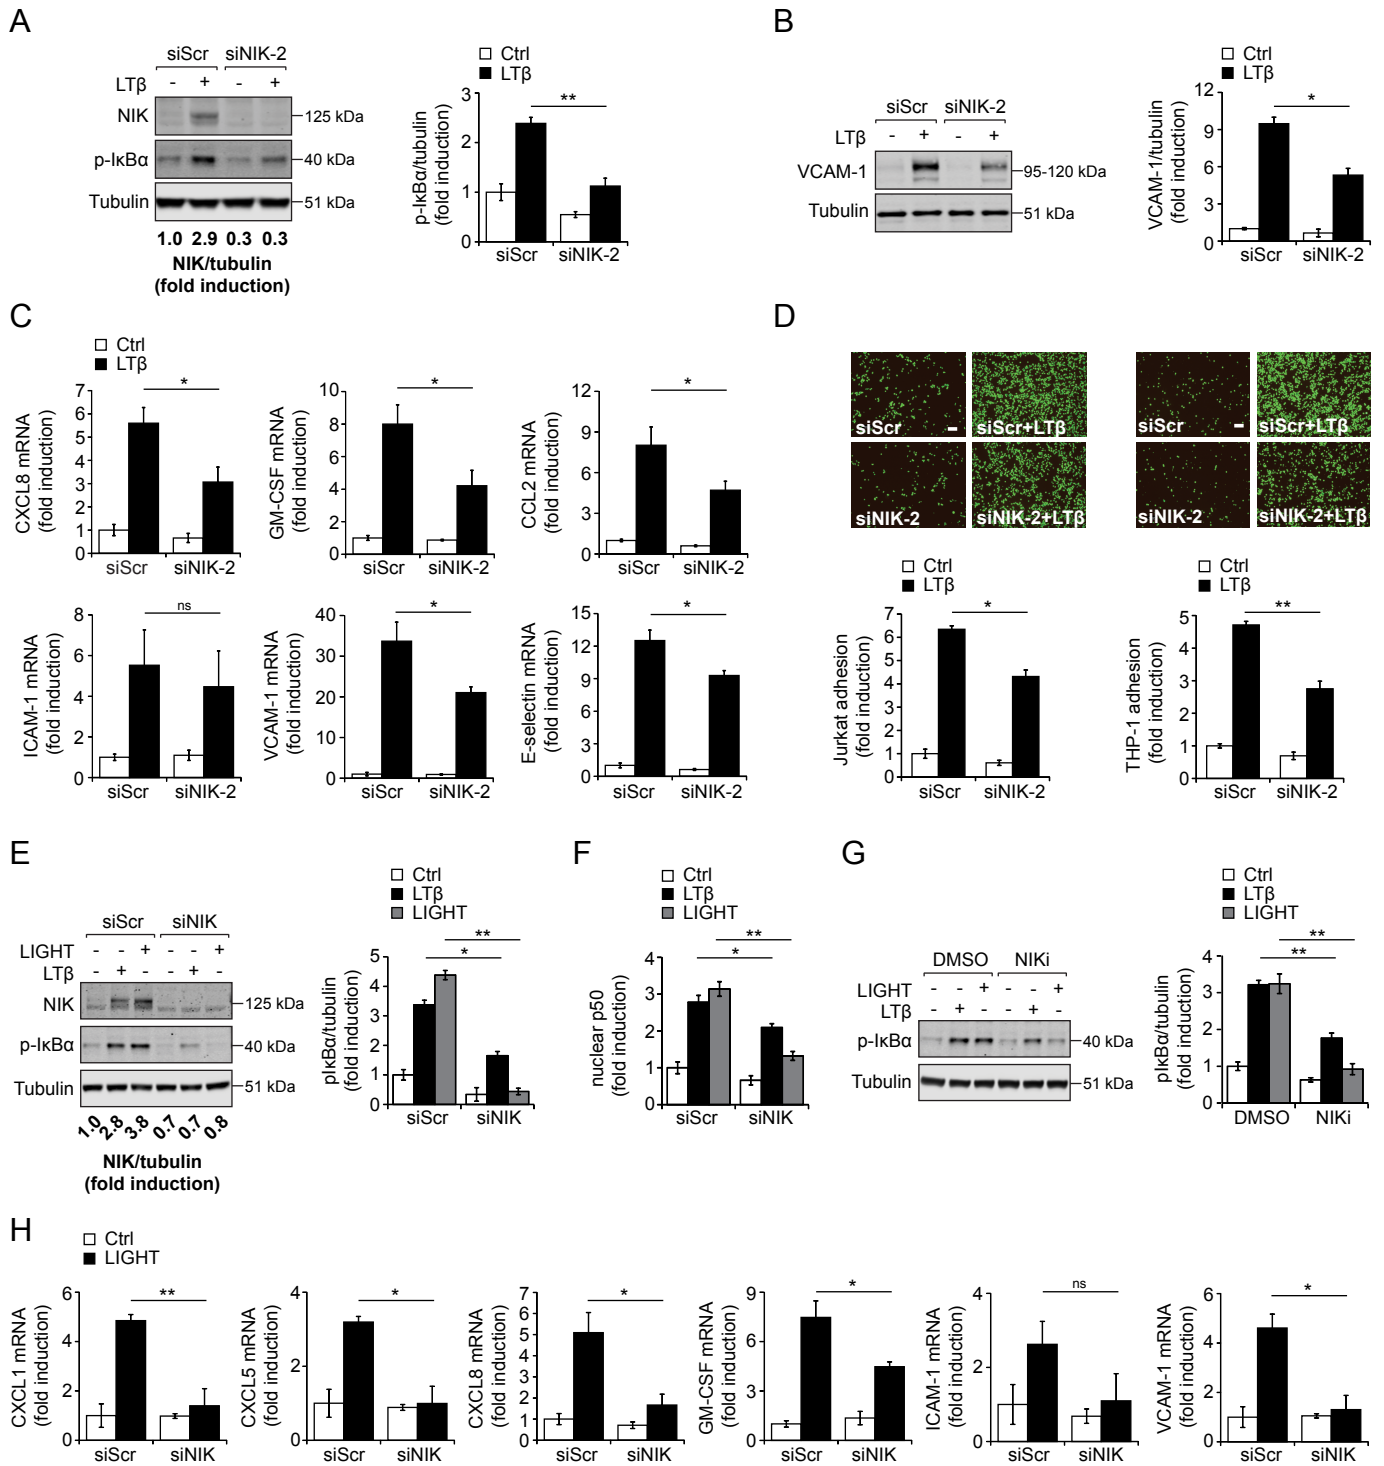

**Figure S5. NIK-dependent activation of canonical NF- $\kappa$ B signaling pathway in endothelial cells upon LT $\beta$ R ligation.** (A) Immunoblot analysis of NIK, phospho-I $\kappa$ B $\alpha$  (Ser32/36) (p-I $\kappa$ B $\alpha$ ) and tubulin as a loading control in HUVECs transfected with scrambled siRNA (siScr; 10 nM) or siRNA targeting NIK (siNIK-2; 10 nM) and stimulated with LT $\beta$  (0.25  $\mu$ g/ml) for 3 hours. Cells were incubated with the proteasome inhibitor MG132 (50  $\mu$ M) for the final hour to prevent NIK and p-I $\kappa$ B $\alpha$  degradation. Left panel: immunoblotting data from a representative experiment. Right panel: densitometric analysis of p-I $\kappa$ B $\alpha$  bands from three independent experiments. (B) Immunoblot analysis of VCAM-1 and tubulin as a loading control in HUVECs transfected with siScr or siNIK-2 as in A and stimulated with LT $\beta$  (0.25  $\mu$ g/ml) for 24 hours. Left panel: immunoblotting data from a representative experiment. Right panel: densitometric analysis of VCAM-1 bands from two independent experiments. (C) Real-time qPCR quantification of the CXCL8, GM-CSF, CCL2, ICAM-1, VCAM-1 and E-selectin transcripts expressed in HUVECs transfected with siScr or siNIK-2 as in A and stimulated with LT $\beta$  (0.25  $\mu$ g/ml) for 6 hours. (D) Adhesion of Jurkat cells (left panels) and THP-1 cells (right panels) to HUVECs transfected with siScr or siNIK-2 as in A and stimulated with LT $\beta$  (0.25  $\mu$ g/ml) for 24 hours. Upper panels: representative images of calcein-labeled leukocytes attached to HUVECs. Scale bar, 100  $\mu$ m. Lower panels: quantification of leukocyte adhesion to HUVECs relative to siScr cells. (E) Immunoblot analysis of NIK, phospho-I $\kappa$ B $\alpha$  (Ser32/36) (p-I $\kappa$ B $\alpha$ ) and tubulin as a loading control in EA.hy926 cells transfected with scrambled siRNA (siScr; 10 nM) or siRNA targeting NIK (siNIK; 10 nM) and stimulated with LT $\beta$  (0.25  $\mu$ g/ml) or LIGHT (0.25  $\mu$ g/ml) for 3 hours. Cells were incubated with the proteasome inhibitor MG132 (50  $\mu$ M) for the final hour to prevent NIK and p-I $\kappa$ B $\alpha$  degradation. Left panel: immunoblotting data from a representative experiment. Right panel: densitometric analysis of p-I $\kappa$ B $\alpha$  bands from three independent experiments. (F) Quantification of p50 DNA binding activity by ELISA in nuclear protein extracts from EA.hy926 cells transfected with siScr or siNIK as in E and stimulated with LT $\beta$  (0.25  $\mu$ g/ml) or LIGHT (0.25  $\mu$ g/ml) for 6 hours. (G) Immunoblot analysis of phospho-I $\kappa$ B $\alpha$  (Ser32/36) (p-I $\kappa$ B $\alpha$ ) and tubulin as a loading control in EA.hy926 cells treated with DMSO or NIK inhibitor (NIK $i$ ; 2.5  $\mu$ M) for 30 minutes, followed by stimulation with LT $\beta$  (0.25  $\mu$ g/ml) or LIGHT (0.25  $\mu$ g/ml) for 3 hours. Cells were incubated with the proteasome inhibitor MG132 (50  $\mu$ M) for the final hour to prevent p-I $\kappa$ B $\alpha$  degradation. Left panel: immunoblotting data from a representative experiment. Right panel: densitometric analysis of p-I $\kappa$ B $\alpha$  bands from five independent experiments. (H) Real-time qPCR quantification of the CXCL1, CXCL5, CXCL8, GM-CSF, ICAM-1 and VCAM-1 transcripts expressed in HMVECs transfected with scrambled siRNA (siScr; 10 nM) or siRNA targeting NIK (siNIK; 10 nM) and stimulated with LIGHT (0.25  $\mu$ g/ml) for 6 hours. Data represent mean  $\pm$  s.e.m. of two (B), three (A,C-F,H) or five (G) independent experiments. ns, not significant; \* $P$  $\leq$ 0.05, \*\* $P$  $\leq$ 0.01 [Student's  $t$  test (A-D,H) or one-way ANOVA and Tukey's HSD post hoc test (E-G)].

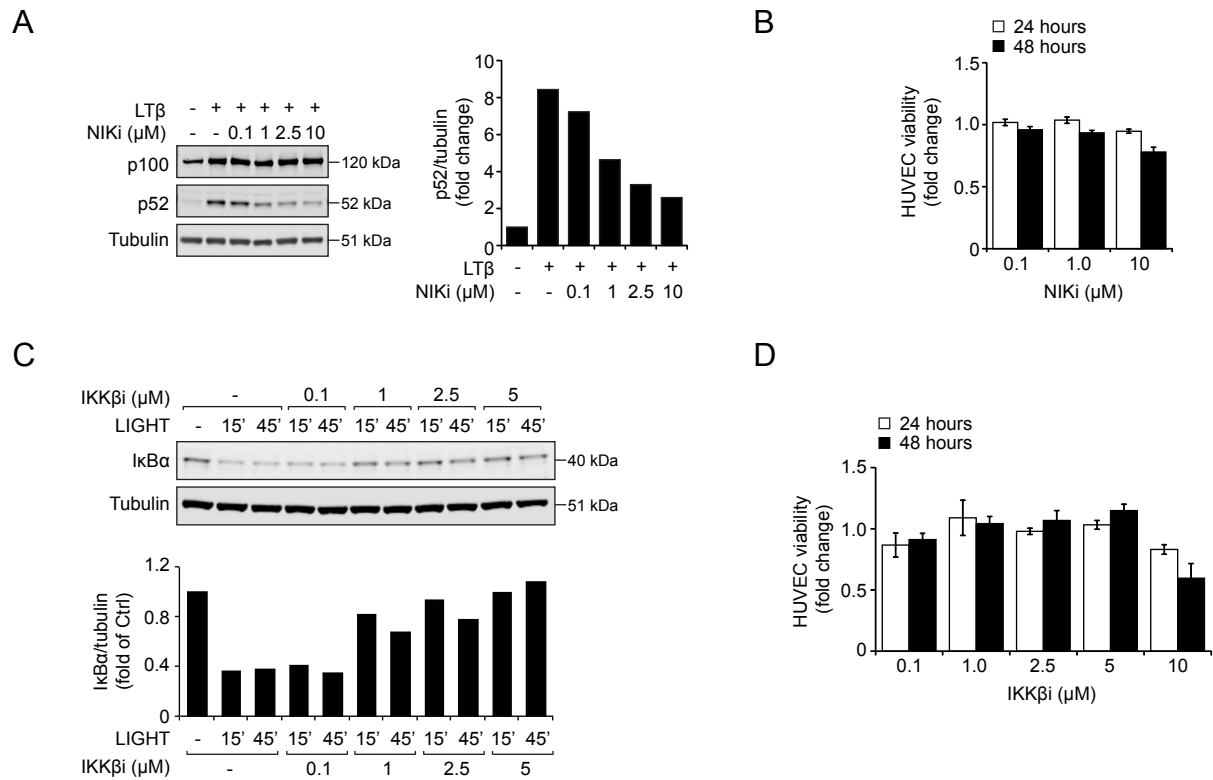

**Figure S6. Activity of NIK and IKKβ inhibitors in HUVECs.** (A) Immunoblot analysis of p100/p52 and tubulin as a loading control in HUVECs treated with DMSO or indicated concentrations of NIK inhibitor (NIK<sub>i</sub>) for 30 minutes, followed by stimulation with LTβ (0.1 μg/ml) for 16 hours. Left panel: immunoblotting data from a representative experiment. Right panel: densitometric analysis of p52 bands from a representative experiment. (B) Quantification of LDH viability assay performed on HUVECs treated with indicated concentrations of NIK<sub>i</sub> for 24 or 48 hours. Graph represents the fold change in cell survival relative to untreated cells ± SD (n = 3). Data shown are representative of two independent experiments. (C) Immunoblot analysis of IκBα and tubulin as a loading control in HUVECs treated with DMSO or IKKβ inhibitor (IKKβ<sub>i</sub>) at indicated concentrations for 30 minutes, followed by stimulation with LIGHT (0.1 μg/ml) for 15 and 45 minutes. Upper panel: immunoblotting data from a representative experiment. Lower panel: densitometric analysis of IκBα bands from a representative experiment. (D) Quantification of MTT viability assay performed on HUVECs treated with indicated concentrations of IKKβ<sub>i</sub> for 24 or 48 hours. Graph represents the fold change in cell survival relative to untreated cells ± SD (n = 3). Data shown are representative of two independent experiments.



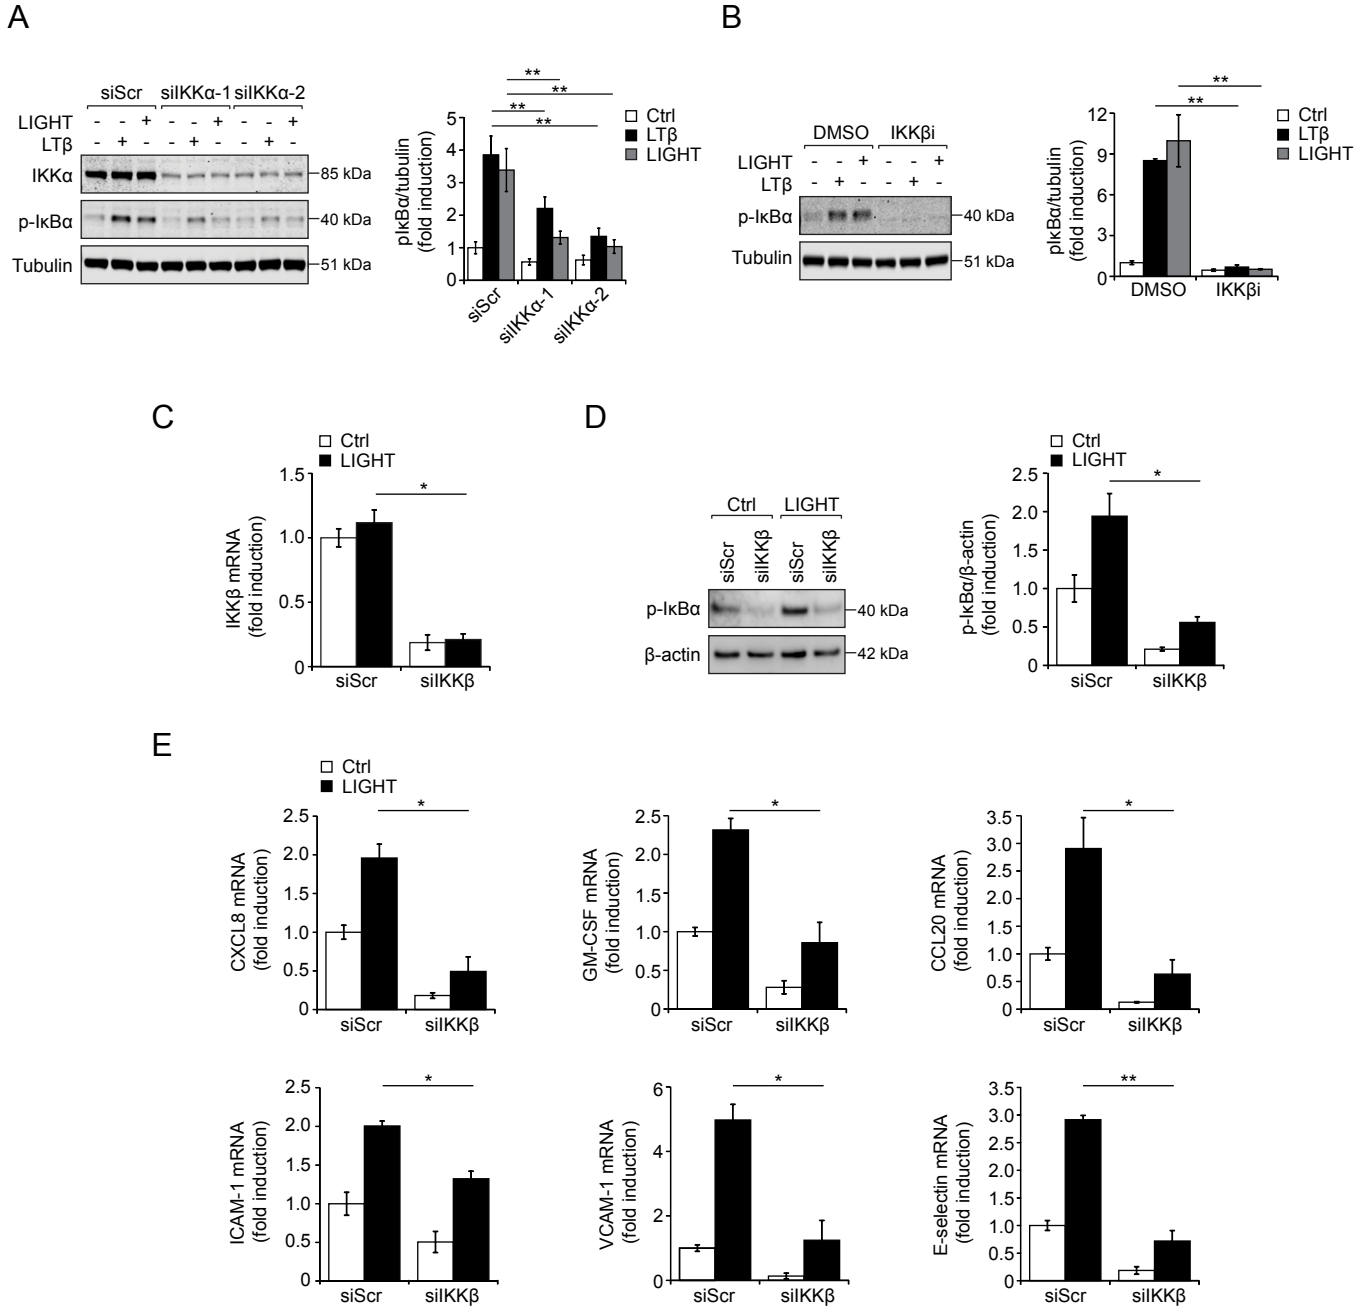

**Figure S7. IKK $\alpha$ - and IKK $\beta$ -dependent activation of canonical NF- $\kappa$ B pathway in EA.hy926 cells and HUVECs upon LT $\beta$ R ligation.** (A) Immunoblot analysis of IKK $\alpha$ , phospho-I $\kappa$ B $\alpha$  (Ser32/36) (p-I $\kappa$ B $\alpha$ ) and tubulin as a loading control in EA.hy926 cells transfected with scrambled siRNA (siScr; 10 nM) or siRNAs targeting IKK $\alpha$  (siIKK $\alpha$ -1 or IKK $\alpha$ -2; 10 nM) and stimulated with LT $\beta$  (0.25  $\mu$ g/ml) or LIGHT (0.25  $\mu$ g/ml) for 3 hours. Cells were incubated with the proteasome inhibitor MG132 (50  $\mu$ M) for the final hour to prevent p-I $\kappa$ B $\alpha$  degradation. Left panel: immunoblotting data from a representative experiment. Right panel: densitometric analysis of p-I $\kappa$ B $\alpha$  bands from four independent experiments. (B) Immunoblot analysis of phospho-I $\kappa$ B $\alpha$  (Ser32/36) (p-I $\kappa$ B $\alpha$ ) and tubulin as a loading control in EA.hy926 cells treated with DMSO or IKK $\beta$  inhibitor (IKK $\beta$ i; 2.5  $\mu$ M) for 30 minutes, followed by stimulation with LT $\beta$  (0.25  $\mu$ g/ml) or LIGHT (0.25  $\mu$ g/ml) for 3 hours. Cells were incubated with the proteasome inhibitor MG132 (50  $\mu$ M) for the final hour to prevent p-I $\kappa$ B $\alpha$  degradation. Left panel: immunoblotting data from a representative experiment. Right panel: densitometric analysis of p-I $\kappa$ B $\alpha$  bands from two independent experiments. (C) Real time qPCR quantification of the IKK $\beta$  transcript expressed in HUVECs transfected with scrambled siRNA (siScr; 50 nM) or siRNA targeting IKK $\beta$  (siIKK $\beta$ ; 50 nM) and stimulated with LIGHT (0.25  $\mu$ g/ml) for 6 hours. (D) Immunoblot analysis of phospho-I $\kappa$ B $\alpha$  (Ser32/36) (p-I $\kappa$ B $\alpha$ ) and  $\beta$ -actin as a loading control in HUVECs transfected with siScr or siIKK $\beta$  as in C and stimulated with LIGHT (0.25  $\mu$ g/ml) for 3 hours. Cells were incubated with the proteasome inhibitor MG132 (50  $\mu$ M) for the final hour to prevent p-I $\kappa$ B $\alpha$  degradation. Left panel: immunoblotting data from a representative experiment. Right panel: densitometric analysis of p-I $\kappa$ B $\alpha$  bands from two independent experiments. (E) Real-time qPCR quantification of the CXCL8, GM-CSF, CCL20, ICAM-1, VCAM-1 and E-selectin transcripts expressed in HUVECs transfected with siScr or siIKK $\beta$  as in C and stimulated with LIGHT (0.25  $\mu$ g/ml) for 6 hours. Data represent mean  $\pm$  s.e.m. of two (B-E) or four (A) independent experiments. \* $P$   $\leq$  0.05, \*\* $P$   $\leq$  0.01 [one-way ANOVA and Tukey's HSD post hoc test (A,B) or Student's  $t$  test (C-E)].
